# Supplementary material for: Exploring potential biomarkers and determining the metabolic mechanism of type 2 diabetes mellitus using liquid chromatography coupled to high-resolution mass spectrometry
Source: Royal Society of Chemistry journal article supplement (doi:10.1039/c7ra05722a), 2017-01-01
Supplement: c7ra05722a1.pdf [file c7ra05722a1.pdf]

Table S1 Diseases or functions annotation of tentatively identified abnormally expressed metabolites in the T2DM

| <b>Diseases or Functions Annotation</b> | <b>p-Value</b> | <b>Activation z-score</b> | <b>Notes</b> | <b>Molecules</b> |
|-----------------------------------------|----------------|---------------------------|--------------|------------------|
| Synthesis of reactive oxygen species    | 0.00000101     | 0.983                     |              | 7                |
| Apoptosis of tumor cell lines           | 0.00128        | 0.504                     |              | 6                |
| Concentration of lipid                  | 0.00253        | 0.208                     | Activation   | 6                |
| Synthesis of eicosanoid                 | 0.0000136      | 1.947                     |              | 5                |
| Generation of reactive oxygen species   | 0.0000173      | 0.984                     |              | 5                |
| Production of reactive oxygen species   | 0.000159       | 1.223                     |              | 5                |
| Growth of epithelial tissue             | 0.00107        | -0.475                    |              | 5                |
| Cellular homeostasis                    | 0.0264         | -1.578                    |              | 5                |
| Cell proliferation of tumor cell lines  | 0.00446        | -1.948                    | Inhibition   | 6                |
| Synthesis of nucleotide                 | 0.00000364     | -1.69                     |              | 5                |
| Binding of DNA                          | 0.0000222      | -1.025                    |              | 5                |

Table S2 The AUC data in the classical univariate ROC curve analysis of 33 tentatively identified biomarkers in our experiment.

| Name                                   | Compound         | Formula                                                         | AUC     |
|----------------------------------------|------------------|-----------------------------------------------------------------|---------|
| L-3-Phenyllactic acid                  | 1.35_165.0545m/z | C <sub>9</sub> H <sub>10</sub> O <sub>3</sub>                   | 1.00000 |
| 2-Phenylethanol glucuronide            | 2.33_299.1148m/z | C <sub>14</sub> H <sub>18</sub> O <sub>7</sub>                  | 1.00000 |
| Cinnamic acid                          | 0.91_147.0442m/z | C <sub>9</sub> H <sub>8</sub> O <sub>2</sub>                    | 0.99866 |
| 4-Hydroxybenzaldehyde                  | 1.08_121.0283m/z | C <sub>7</sub> H <sub>6</sub> O <sub>2</sub>                    | 0.98728 |
| Beta-Leucine                           | 0.81_130.0864m/z | C <sub>6</sub> H <sub>13</sub> NO <sub>2</sub>                  | 0.98036 |
| Beta-Tyrosine                          | 0.67_180.0650m/z | C <sub>9</sub> H <sub>11</sub> NO <sub>3</sub>                  | 0.97232 |
| Sorbitol-6-phosphate                   | 1.05_261.0383m/z | C <sub>6</sub> H <sub>15</sub> O <sub>9</sub> P                 | 0.95536 |
| L-Carnitine                            | 0.50_162.1131m/z | C <sub>7</sub> H <sub>15</sub> NO <sub>3</sub>                  | 0.93393 |
| SM(d18:0/24:1(15Z))                    | 2.77_815.6941m/z | C <sub>47</sub> H <sub>95</sub> N <sub>2</sub> O <sub>6</sub> P | 0.84643 |
| Azelaic acid                           | 1.69_187.0965m/z | C <sub>9</sub> H <sub>16</sub> O <sub>4</sub>                   | 0.84509 |
| LysoPC(15:0)                           | 5.96_482.3258m/z | C <sub>23</sub> H <sub>48</sub> NO <sub>7</sub> P               | 0.84107 |
| Docosaehaenoic acid                    | 6.92_327.2325m/z | C <sub>22</sub> H <sub>32</sub> O <sub>2</sub>                  | 0.83884 |
| LysoPC(18:1(9Z))                       | 4.77_522.3574m/z | C <sub>26</sub> H <sub>52</sub> NO <sub>7</sub> P               | 0.83326 |
| 17a,21-Dihydroxypreg-nenolone          | 7.27_347.2199m/z | C <sub>21</sub> H <sub>32</sub> O <sub>4</sub>                  | 0.82790 |
| LysoPC(16:0)                           | 4.25_496.3420m/z | C <sub>24</sub> H <sub>50</sub> NO <sub>7</sub> P               | 0.82522 |
| Inositol cyclic phosphate              | 3.85_241.0119m/z | C <sub>6</sub> H <sub>11</sub> O <sub>8</sub> P                 | 0.82299 |
| LysoPC(18:2(9Z,12Z))                   | 3.88_520.3416m/z | C <sub>26</sub> H <sub>50</sub> NO <sub>7</sub> P               | 0.81183 |
| Gentisate aldehyde                     | 1.86_137.0235m/z | C <sub>7</sub> H <sub>6</sub> O <sub>3</sub>                    | 0.80469 |
| LysoPC(16:1(9Z))                       | 3.75_494.3257m/z | C <sub>24</sub> H <sub>48</sub> NO <sub>7</sub> P               | 0.80126 |
| LysoPC(18:0)                           | 5.64_524.3728m/z | C <sub>26</sub> H <sub>54</sub> NO <sub>7</sub> P               | 0.79584 |
| LysoPC(14:0)                           | 3.95_466.2943m/z | C <sub>22</sub> H <sub>46</sub> NO <sub>7</sub> P               | 0.79464 |
| Palmitic acid                          | 4.47_255.2323m/z | C <sub>16</sub> H <sub>32</sub> O <sub>2</sub>                  | 0.75759 |
| Chenodeoxycholic acid                  | 6.53_391.2827m/z | C <sub>24</sub> H <sub>40</sub> O <sub>4</sub>                  | 0.73214 |
| Murocholic acid                        | 6.70_391.2837m/z | C <sub>24</sub> H <sub>40</sub> O <sub>4</sub>                  | 0.71317 |
| Cholesterol sulfate                    | 7.19_465.3097m/z | C <sub>27</sub> H <sub>46</sub> O <sub>4</sub> S                | 0.71317 |
| Cytidine                               | 0.52_242.0790m/z | C <sub>9</sub> H <sub>13</sub> N <sub>3</sub> O <sub>5</sub>    | 0.71183 |
| Taurodeoxycholic acid                  | 2.51_498.2876m/z | C <sub>26</sub> H <sub>45</sub> NO <sub>6</sub> S               | 0.69598 |
| Deoxycholic acid 3-glucuronide         | 2.75_567.3188m/z | C <sub>30</sub> H <sub>48</sub> O <sub>10</sub>                 | 0.68527 |
| Sphingosine 1-phosphate                | 3.48_378.2398m/z | C <sub>18</sub> H <sub>38</sub> NO <sub>5</sub> P               | 0.67790 |
| Acetyl-N-formyl-5-methoxykynurenamine  | 1.24_263.1029m/z | C <sub>13</sub> H <sub>16</sub> N <sub>2</sub> O <sub>4</sub>   | 0.66362 |
| LysoPC(17:0)                           | 6.02_508.3418m/z | C <sub>25</sub> H <sub>52</sub> NO <sub>7</sub> P               | 0.62165 |
| PC(18:3(6Z,9Z,12Z)/18:1(11Z))          | 7.92_782.5685m/z | C <sub>44</sub> H <sub>80</sub> NO <sub>8</sub> P               | 0.60915 |
| 14,15-Epoxy-5,8,11-eicosatrienoic acid | 4.41_319.2272m/z | C <sub>20</sub> H <sub>32</sub> O <sub>3</sub>                  | 0.59531 |

Table S3 The basic information of T2DM patient

| <b>NO.</b> | <b>Gender</b> | <b>Age</b> | <b>Diagnosis</b>                                                                                                          |
|------------|---------------|------------|---------------------------------------------------------------------------------------------------------------------------|
| 1          | female        | 59         | 1.Type 2 diabetes mellitus<br>2.Hypertension<br>3.Hyperlipidemia                                                          |
| 2          | male          | 80         | 1.Type 2 diabetes mellitus<br>2.Hypertension<br>3.Coronary atherosclerotic cardiopathy<br>4.Pulmonary emphysema           |
| 3          | male          | 57         | 1.Type 2 diabetes mellitus<br>2.Hypertension<br>3.Coronary atherosclerotic cardiopathy                                    |
| 4          | male          | 80         | 1.Type 2 diabetes mellitus<br>2.Hypertension<br>3.Coronary atherosclerotic cardiopathy<br>4.Cerebral infarction           |
| 5          | female        | 79         | 1.Type 2 diabetes mellitus<br>2.Hypertension<br>3.Coronary atherosclerotic cardiopathy<br>4.Hyperlipidemia                |
| 6          | male          | 60         | 1.Type 2 diabetes mellitus<br>2.Hypertension<br>3.Coronary atherosclerotic cardiopathy<br>4.Hyperlipidemia                |
| 7          | male          | 80         | 1.Type 2 diabetes mellitus<br>2.Hypertension<br>3.Coronary atherosclerotic cardiopathy<br>4.Cerebral infarction           |
| 8          | female        | 76         | 1.Type 2 diabetes mellitus<br>2.Hypertension                                                                              |
| 9          | female        | 66         | 1.Type 2 diabetes mellitus<br>2.Hypertension<br>3.Coronary atherosclerotic cardiopathy                                    |
| 10         | female        | 65         | 1.Type 2 diabetes mellitus<br>2.Hypertension<br>3.Coronary atherosclerotic cardiopathy<br>4.Acute cerebrovascular disease |
| 11         | female        | 70         | 1.Type 2 diabetes mellitus<br>2.Hypertension<br>3.Unstable angina                                                         |

|    |        |    |                                                                                                                                                                                                                                |
|----|--------|----|--------------------------------------------------------------------------------------------------------------------------------------------------------------------------------------------------------------------------------|
| 12 | female | 79 | <ol style="list-style-type: none"> <li>4.Unexplained edema</li> <li>1.Type 2 diabetes mellitus</li> <li>2. Sequel of cerebral infarction</li> <li>3.Hypertension</li> <li>4.Coronary atherosclerotic cardiopathy</li> </ol>    |
| 13 | female | 75 | <ol style="list-style-type: none"> <li>1.Type 2 diabetes mellitus</li> <li>2.Hypertension</li> <li>3.Cerebral infarction</li> <li>4. Cardiac failure</li> </ol>                                                                |
| 14 | female | 63 | <ol style="list-style-type: none"> <li>1.Type 2 diabetes mellitus</li> <li>2.Hypertension</li> <li>3.Cerebral infarction</li> <li>4. Cardiac failure</li> </ol>                                                                |
| 15 | female | 66 | <ol style="list-style-type: none"> <li>1.Type 2 diabetes mellitus</li> <li>2.Hypertension</li> <li>3.Cerebral infarction</li> <li>4.Coronary atherosclerotic cardiopathy</li> </ol>                                            |
| 16 | male   | 66 | <ol style="list-style-type: none"> <li>1.Type 2 diabetes mellitus</li> <li>2.Coronary atherosclerotic cardiopathy</li> <li>3.Hypertension</li> <li>4.Diabetic peripheral neuropathy</li> <li>5.Diabetic retinopathy</li> </ol> |
| 17 | male   | 63 | <ol style="list-style-type: none"> <li>1.Type 2 diabetes mellitus</li> <li>2.Hypertension</li> </ol>                                                                                                                           |
| 18 | female | 69 | <ol style="list-style-type: none"> <li>1.Type 2 diabetes mellitus</li> <li>2.Hypertension</li> <li>3.Coronary atherosclerotic cardiopathy</li> <li>4.Hyperlipidemia</li> </ol>                                                 |
| 19 | male   | 56 | <ol style="list-style-type: none"> <li>1.Type 2 diabetes mellitus</li> <li>2.Hypertension</li> <li>3.Acute myocardial infarction</li> </ol>                                                                                    |
| 20 | female | 67 | <ol style="list-style-type: none"> <li>1.Type 2 diabetes mellitus</li> <li>2.Hypertension</li> <li>3.transient cerebral ischemia</li> </ol>                                                                                    |
| 21 | female | 70 | <ol style="list-style-type: none"> <li>1.Type 2 diabetes mellitus</li> <li>2.Hypertension</li> <li>3.Coronary atherosclerotic cardiopathy</li> <li>4.Hyperlipidemia</li> </ol>                                                 |
| 22 | female | 76 | <ol style="list-style-type: none"> <li>1.Type 2 diabetes mellitus</li> <li>2.Hypertension</li> <li>3.Coronary atherosclerotic cardiopathy</li> </ol>                                                                           |

|    |        |    |                                                                                                                                                                                        |
|----|--------|----|----------------------------------------------------------------------------------------------------------------------------------------------------------------------------------------|
| 23 | male   | 65 | 4.Hyperlipidemia<br>5.Old cerebral infarction<br>1.Type 2 diabetes mellitus<br>2.Hyperlipidemia<br>3.Coronary atherosclerotic cardiopathy                                              |
| 24 | female | 65 | 4.Hypertension<br>1.Type 2 diabetes mellitus<br>2.Hypertension<br>3.Coronary atherosclerotic cardiopathy                                                                               |
| 25 | female | 73 | 1.Type 2 diabetes mellitus<br>2.Hypertension<br>3.Coronary atherosclerotic cardiopathy                                                                                                 |
| 26 | male   | 59 | 4.Cervical spondylosis<br>1.Type 2 diabetes mellitus<br>2.Hypertension<br>3.Coronary atherosclerotic cardiopathy                                                                       |
| 27 | male   | 53 | 1.Type 2 diabetes mellitus<br>2.Hypertension<br>3.Coronary atherosclerotic cardiopathy                                                                                                 |
| 28 | female | 51 | 4.Chronic renal failure<br>5.Hypothyroidism<br>1.Type 2 diabetes mellitus<br>2.Hyperlipidemia<br>3.Coronary atherosclerotic cardiopathy                                                |
| 29 | male   | 61 | 4.Hypertension<br>5.Old cerebral infarction<br>1.Type 2 diabetes mellitus<br>2.Hyperlipidemia<br>3.Coronary atherosclerotic cardiopathy                                                |
| 30 | male   | 79 | 4.Cerebral infarction<br>1.Type 2 diabetes mellitus<br>2.Hyperlipidemia<br>3.Coronary atherosclerotic cardiopathy<br>4.Protrusion of lumbar intervertebral disc<br>5.Unexplained edema |
| 31 | female | 62 | 1.Type 2 diabetes mellitus<br>2.Hyperlipidemia<br>3.Coronary atherosclerotic cardiopathy<br>4.Cerebral infarction<br>5.Kidney stone                                                    |
| 32 | female | 54 | 1.Type 2 diabetes mellitus                                                                                                                                                             |

|    |        |    |                                            |
|----|--------|----|--------------------------------------------|
|    |        |    | 2.Hyperlipidemia                           |
|    |        |    | 3.Coronary atherosclerotic cardiopathy     |
|    |        |    | 4.Osteoporosis                             |
| 33 | male   | 80 | 1.Type 2 diabetes mellitus                 |
|    |        |    | 2.Hyperlipidemia                           |
|    |        |    | 3.Coronary atherosclerotic cardiopathy     |
|    |        |    | 4.Old cerebral infarction                  |
|    |        |    | 5.Renal insufficiency                      |
| 34 | female | 68 | 1.Type 2 diabetes mellitus                 |
|    |        |    | 2.Hyperlipidemia                           |
|    |        |    | 3.Coronary atherosclerotic cardiopathy     |
|    |        |    | 4.Hypertension                             |
|    |        |    | 5.Hepatic injury                           |
| 35 | female | 73 | 1.Type 2 diabetes mellitus                 |
|    |        |    | 2.Hyperlipidemia                           |
|    |        |    | 3.Coronary atherosclerotic cardiopathy     |
|    |        |    | 4.Hypertension                             |
|    |        |    | 5.Unexplained edema                        |
| 36 | female | 75 | 1.Type 2 diabetes mellitus                 |
|    |        |    | 2.Hyperlipidemia                           |
|    |        |    | 3.Coronary atherosclerotic cardiopathy     |
|    |        |    | 4.Hypertension                             |
|    |        |    | 5.Chronic bronchitis                       |
| 37 | male   | 78 | 1.Type 2 diabetes mellitus                 |
|    |        |    | 2.Hyperlipidemia                           |
|    |        |    | 3.Coronary atherosclerotic cardiopathy     |
|    |        |    | 4.Hypertension                             |
|    |        |    | 5. Benign Prostatic Hyperplasia            |
| 38 | female | 64 | 1.Type 2 diabetes mellitus                 |
|    |        |    | 2.Diabetic peripheral neuropathy           |
|    |        |    | 3.Hypertension                             |
|    |        |    | 4.Unstable angina                          |
|    |        |    | 5.Protrusion of lumbar intervertebral disc |
| 39 | female | 66 | 1.Type 2 diabetes mellitus                 |
|    |        |    | 2.Hyperlipidemia                           |
|    |        |    | 3.Coronary atherosclerotic cardiopathy     |
|    |        |    | 4.Hypertension                             |
| 40 | female | 80 | 1.Type 2 diabetes mellitus                 |
|    |        |    | 2.Hypertension                             |
|    |        |    | 3.Renal insufficiency                      |
| 41 | female | 78 | 1.Type 2 diabetes mellitus                 |

|    |        |    |                                         |
|----|--------|----|-----------------------------------------|
|    |        |    | 2.Hypertension                          |
|    |        |    | 3.Stable angina                         |
| 42 | male   | 73 | 1.Type 2 diabetes mellitus              |
|    |        |    | 2.Hypertension                          |
|    |        |    | 3.Chronic obstructive pulmonary disease |
|    |        |    | 4.Double pulmonary interstitial lesions |
| 43 | female | 80 | 1.Type 2 diabetes mellitus              |
|    |        |    | 2.Hyperlipidemia                        |
|    |        |    | 3.Coronary atherosclerotic cardiopathy  |
|    |        |    | 4.Hypertension                          |
|    |        |    | 5.Old cerebral infarction               |
| 44 | female | 75 | 1.Type 2 diabetes mellitus              |
|    |        |    | 2.Hypertension                          |
|    |        |    | 3.Chronic bronchitis                    |
|    |        |    | 4.Diabetic peripheral neuropathy        |
|    |        |    | 5.Diabetic retinopathy                  |
| 45 | male   | 76 | 1.Type 2 diabetes mellitus              |
|    |        |    | 2.Hyperlipidemia                        |
|    |        |    | 3.Coronary atherosclerotic cardiopathy  |
|    |        |    | 4.Hypertension                          |
|    |        |    | 5.Chronic bronchitis                    |
|    |        |    | 6.Cervical spondylosis                  |
| 46 | female | 59 | 1.Type 2 diabetes mellitus              |
|    |        |    | 2.Hyperlipidemia                        |
|    |        |    | 3.Coronary atherosclerotic cardiopathy  |
|    |        |    | 4.Hypertension                          |
|    |        |    | 5.Old cerebral infarction               |
| 47 | female | 78 | 1.Type 2 diabetes mellitus              |
|    |        |    | 2.Hyperlipidemia                        |
|    |        |    | 3.Coronary atherosclerotic cardiopathy  |
|    |        |    | 4.Hypertension                          |
|    |        |    | 5.Diabetic retinopathy                  |
|    |        |    | 6. Cataract                             |
| 48 | male   | 54 | 1.Type 2 diabetes mellitus              |
|    |        |    | 2.Coronary atherosclerotic cardiopathy  |
| 49 | male   | 80 | 1.Type 2 diabetes mellitus              |
|    |        |    | 2.Coronary atherosclerotic cardiopathy  |
| 50 | male   | 60 | 1.Type 2 diabetes mellitus              |
|    |        |    | 2.Coronary atherosclerotic cardiopathy  |
| 51 | female | 76 | 1.Type 2 diabetes mellitus              |
|    |        |    | 2.Coronary atherosclerotic cardiopathy  |

|    |        |    |                                                                                                                                      |
|----|--------|----|--------------------------------------------------------------------------------------------------------------------------------------|
| 52 | female | 64 | 3.Cerebral infarction<br>1.Type 2 diabetes mellitus<br>2.Coronary atherosclerotic cardiopathy                                        |
| 53 | female | 62 | 3.Cerebral infarction<br>1.Type 2 diabetes mellitus<br>2.Coronary atherosclerotic cardiopathy                                        |
| 54 | male   | 65 | 3. Nephrotic syndrome<br>1.Type 2 diabetes mellitus<br>2.Hyperlipidemia                                                              |
| 55 | female | 51 | 3.Coronary atherosclerotic cardiopathy<br>1.Type 2 diabetes mellitus<br>2.Hyperlipidemia                                             |
| 56 | female | 80 | 4.Reflux esophagitis<br>3.Coronary atherosclerotic cardiopathy<br>1.Type 2 diabetes mellitus<br>2.Hyperlipidemia                     |
| 57 | female | 71 | 4.Chronic pyelonephritis<br>3.Diabetic peripheral neuropathy<br>2.Coronary atherosclerotic cardiopathy<br>1.Type 2 diabetes mellitus |
| 58 | male   | 51 | 3.Chronic renal failure<br>3.Coronary atherosclerotic cardiopathy<br>1.Type 2 diabetes mellitus                                      |
| 59 | female | 58 | 2.Hyperlipidemia<br>4.Old cerebral infarction<br>3.Coronary atherosclerotic cardiopathy<br>1.Type 2 diabetes mellitus                |
| 60 | male   | 72 | 2.Unstable angina<br>1.Type 2 diabetes mellitus                                                                                      |
| 61 | male   | 58 | 2.Hyperlipidemia<br>3.Chronic obstructive pulmonary disease<br>4.Dilated cardiomyopathy                                              |
| 62 | male   | 65 | 3.Unstable angina<br>2.Hyperlipidemia<br>1.Type 2 diabetes mellitus                                                                  |
| 63 | male   | 67 | 4.Pleural effusion<br>3.Chronic lymphocytic leukemia<br>2.Coronary atherosclerotic cardiopathy<br>1.Type 2 diabetes mellitus         |



64

male

80

1.Type 2 diabetes mellitus

2.Hyperlipidemia

3.Renal insufficiency

4. Cardiac failure

5.Hyperuricemia

---
